## RESEARCH ARTICLE

# Infant feeding method and special educational need in 191,745 Scottish schoolchildren: A national, population cohort study

Lisa J. Adams<sup>1</sup>, Jill P. Pell<sup>1</sup>, Daniel F. Mackay<sup>1</sup>, David Clark<sup>2</sup>, Albert King<sup>3</sup>, Michael Fleming<sup>1\*</sup>

**1** School of Health and Wellbeing, University of Glasgow, Glasgow, United Kingdom, **2** Public Health Scotland, Edinburgh, United Kingdom, **3** ScotXed, Scottish Government, Edinburgh, United Kingdom

\* [michael.fleming@glasgow.ac.uk](mailto:michael.fleming@glasgow.ac.uk)

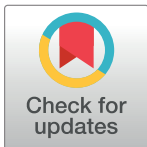

## OPEN ACCESS

**Citation:** Adams LJ, Pell JP, Mackay DF, Clark D, King A, Fleming M (2023) Infant feeding method and special educational need in 191,745 Scottish schoolchildren: A national, population cohort study. *PLoS Med* 20(4): e1004191. <https://doi.org/10.1371/journal.pmed.1004191>

**Received:** July 13, 2022

**Accepted:** February 6, 2023

**Published:** April 6, 2023

**Copyright:** © 2023 Adams et al. This is an open access article distributed under the terms of the [Creative Commons Attribution License](https://creativecommons.org/licenses/by/4.0/), which permits unrestricted use, distribution, and reproduction in any medium, provided the original author and source are credited.

**Data Availability Statement:** The authors applied for permission to access, link and analyse these data within a safe haven environment and undertook mandatory training in data protection, IT security and information governance. Therefore, the datasets generated and analysed during the study are not publicly available. All health data are owned by Public Health Scotland (<https://www.publichealthscotland.scot>), and all education data are owned by the Scottish Government ([www2.gov.scot/Topics/Statistics/ScotXed](http://www2.gov.scot/Topics/Statistics/ScotXed)). Interested researchers may apply at these sites for data access to health and education data by emailing [phs.edris@phs.scot](mailto:phs.edris@phs.scot) and

## Abstract

### Background

While special educational needs (SEN) are increasingly recorded among schoolchildren, infant breastfeeding has been associated with reduced incidence of childhood physical and mental health problems. This study investigated relationships between infant feeding method and risk of all-cause and cause-specific SEN.

### Methods and findings

A population cohort of schoolchildren in Scotland was constructed by linking together health (maternity, birth, and health visitor records) and education (annual school pupil census) databases. Inclusion was restricted to singleton children, born in Scotland from 2004 onwards with available breastfeeding data and who attended local authority mainstream or special schools between 2009 and 2013. Generalised estimating equation models with a binomial distribution and logit link function investigated associations between infant feeding method at 6 to 8 weeks and all-cause and cause-specific SEN, adjusting for sociodemographic and maternity factors.

Of 191,745 children meeting inclusion criteria, 126,907 (66.2%) were formula-fed, 48,473 (25.3%) exclusively breastfed, and 16,365 (8.5%) mixed-fed. Overall, 23,141 (12.1%) children required SEN. Compared with formula feeding, mixed feeding and exclusive breastfeeding, respectively, were associated with decreased all-cause SEN (OR 0.90, 95% CI [0.84,0.95],  $p < 0.001$  and 0.78, [0.75,0.82],  $p < 0.001$ ), and SEN attributed to learning disabilities (0.75, [0.65,0.87],  $p < 0.001$  and 0.66, [0.59,0.74],  $p < 0.001$ ), and learning difficulties (0.85, [0.77,0.94],  $p = 0.001$  and 0.75, [0.70,0.81],  $p < 0.001$ ). Compared with formula feeding, exclusively breastfed children had less communication problems (0.81, [0.74,0.88],  $p = 0.001$ ), social-emotional-behavioural difficulties (0.77, [0.70,0.84],  $p = 0.001$ ), sensory impairments (0.79, [0.65,0.95],  $p = 0.01$ ), physical motor disabilities (0.78, [0.66,0.91],  $p = 0.002$ ), and physical health conditions (0.74, [0.63,0.87],  $p = 0.01$ ). There

[ASU\\_schools\\_Data\\_Access@gov.scot](mailto:ASU_schools_Data_Access@gov.scot) respectively.

**Funding:** The study was funded by Health Data Research UK ([www.hdruk.ac.uk](http://www.hdruk.ac.uk)) (grant reference number MR/S003800/1 to MF). HDR UK is a joint investment led by the Medical Research Council, together with the National Institute for Health Research (England), the Chief Scientist Office (Scotland), Health and Care Research Wales, Health and Social Care Research and Development Division (Public Health Agency, Northern Ireland), the Engineering and Physical Sciences Research Council, the Economic and Social Research Council, the British Heart Foundation and Wellcome. The funders had no role in study design, data collection and analysis, decision to publish, or preparation of the manuscript.

**Competing interests:** The authors have declared that no competing interests exist.

**Abbreviations:** ADHD, attention deficit hyperactivity disorder; ASD, autistic spectrum disorder; CHI, Community Health Index; GEE, generalised estimating equation; IQ, intelligence quotient; QIC, quasi-likelihood under the independence model criterion; SCN, Scottish Candidate Number; SEN, special educational need; SENCO, special educational needs coordinator; WHO, World Health Organisation.

were no significant associations for mixed-fed children (communication problems (0.94, [0.83, 1.06],  $p = 0.312$ ), social–emotional–behavioural difficulties (0.96, [0.85, 1.09],  $p = 0.541$ ), sensory impairments (1.07, [0.84, 1.37],  $p = 0.579$ ), physical motor disabilities (0.97, [0.78, 1.19],  $p = 0.754$ ), and physical health conditions (0.93, [0.74, 1.16],  $p = 0.504$ )). Feeding method was not significantly associated with mental health conditions (exclusive 0.58 [0.33, 1.03],  $p = 0.061$  and mixed 0.74 [0.36, 1.53],  $p = 0.421$ ) or autism (exclusive 0.88 [0.77, 1.01],  $p = 0.074$  and mixed 1.01 [0.84, 1.22],  $p = 0.903$ ). Our study was limited since only 6- to 8-week feeding method was available precluding differentiation between never-breastfed infants and those who stopped breastfeeding before 6 weeks. Additionally, we had no data on maternal and paternal factors such as education level, IQ, employment status, race/ethnicity, or mental and physical health.

## Conclusions

In this study, we observed that both breastfeeding and mixed feeding at 6 to 8 weeks were associated with lower risk of all-cause SEN, and SEN attributed to learning disabilities and learning difficulty. Many women struggle to exclusively breastfeed for the full 6 months recommended by WHO; however, this study provides evidence that a shorter duration of non-exclusive breastfeeding could nonetheless be beneficial with regard to the development of SEN. Our findings augment the existing evidence base concerning the advantages of breastfeeding and reinforce the importance of breastfeeding education and support.

## Author summary

### Why was this study done?

- Infant breastfeeding has been associated with reduced physical and mental health problems in childhood which contribute toward special educational need (SEN).
- Previous studies have not investigated the impact of mixed feeding, have not adjusted for child, maternal, and pregnancy confounders, have encountered bias, or have used a narrow definition of SEN.

### What did the researchers do and find?

- We linked national, routinely collected, health data (maternity, birth, and health visitor records) and education data (annual school pupil census) together to investigate the association between mode of infant feeding at 6 to 8 weeks of age and both all-cause and cause-specific SEN in Scotland.
- Our study cohort comprised all singleton children, born in Scotland from 2004 onwards with available breastfeeding data and who attended local authority mainstream or special schools in Scotland between 2009 and 2013.

- Outcomes for 48,473 exclusively breastfed children and 16,365 mixed-fed children, respectively, were compared to 126,907 formula-fed children, adjusting for sociodemographic and maternity factors.
- Compared to children who were formula-fed, we observed that, after adjusting for available sociodemographic and maternity factors, exclusively breastfed children and mixed-fed children both had lower risk of all-cause SEN and SEN attributed to learning disabilities and learning difficulties. Exclusively breastfed children additionally had lower risk of communication problems, social–emotional–behavioural difficulties, sensory impairments, physical motor disabilities, and physical health conditions.

### What do these findings mean?

- For women who struggle to breastfeed for the full 6 months recommended by WHO, our study suggests that a shorter duration of nonexclusive breastfeeding could still be beneficial with regard to the development of SEN.
- Our findings augment the existing evidence base concerning the advantages of breastfeeding and reinforce the importance of breastfeeding education and support.

## Introduction

The number of children in Scotland with a record of special educational need (SEN) increased almost 4-fold between 2010 and 2018 [1], and, by 2020, almost a third of pupils in Scotland had a record of SEN [2]. While higher case ascertainment may have contributed, it nonetheless represents a significant burden on the education, health, and social sectors, as well as substantial impact on the affected individuals, their families, and wider society [3]. Children with SEN experience lower educational attainment [4,5], higher rates of school absenteeism and exclusion, and higher rates of bullying and maltreatment [6–8], further impacting their physical and mental health and well-being [9]. Discovering modifiable early life risk factors for SEN is therefore important to enable these burdens to potentially be eased through prevention or earlier detection.

Method of infant feeding is one factor that is worth investigating when considering early life risk factors for SEN. It is the recommendation of the World Health Organisation (WHO) that, for the first 6 months of their life, children be breastfed exclusively, due to the health benefits that it affords to both mother and baby [10,11]. Breastfeeding has been shown to be associated with reduced risk of a range of physical health outcomes including gastrointestinal, respiratory, and urinary tract infections, otitis media, asthma, obesity, and diabetes [12,13]. There is also evidence of reduced risk of conditions known to be associated with SEN: autistic spectrum disorder (ASD) [14,15], attention deficit hyperactivity disorder (ADHD) [16,17], communication problems [18,19], mental health problems [20,21], behavioural problems, and impaired social development [22,23], and evidence that breastfeeding may be associated with higher levels of intelligence in later life [24,25]. There is therefore the possibility that breastfeeding could be protective against the development of learning problems, and, given that the most common reason for SEN in Scotland is learning difficulties or disabilities [26], this adds

further strength to the hypothesis that infant feeding method may influence the development of all-cause SEN. The nutritional, hormonal, and chemical components of breast milk may directly impact neurodevelopment and risk of disease [27–29]. However, the maternal–infant bonding associated with breastfeeding may also affect child development [30,31].

Previous studies on the associations between infant feeding method and overall risk of outcomes that can contribute to SEN have been limited in number, unable to adjust comprehensively for child, maternal, and pregnancy confounders [32–34], prone to selection bias or recall bias [35,36], unable to take account of mixed feeding [8,32–39], or used a narrow definition of SEN covering only intellectual disability [35]. This study aims to add to the existing evidence and address these limitations by linking national, routinely collected health and educational data together to investigate the association between mode of infant feeding at 6 to 8 weeks of age and both all-cause and cause-specific SEN in Scotland. To the best of our knowledge, the associations between infant feeding method and risk of outcomes contributing to SEN have not previously been investigated on a population-wide scale. Furthermore, this study fills a gap in the literature by investigating a wider range of outcomes than previous studies, investigating formal school-recorded data on SEN, and comparing exclusively breastfed children against mixed-fed children and formula-fed children. We hypothesise that children who are exclusively breastfed will have lower risk of subsequent all-cause and cause-specific SEN compared to children who are mixed-fed and formula-fed.

## Methods

This study is reported as per the Strengthening the Reporting of Observational Studies in Epidemiology (STROBE) guideline ([S1 STROBE Checklist](#)). While we did not publish an analysis plan, our analyses were planned before the research team accessed any data. Data were extracted in June 2015, as part of a wider linkage project [40], and this specific study commenced in February 2021, utilising the same data.

## Databases

A Scotland-wide cohort was constructed by linking records, at an individual level, from 3 health (maternity, birth, and health visitor records) and 1 education (annual school pupil census) database. Scottish education and health records contain pupil-unique Scottish Candidate Numbers (SCNs) and patient-unique Community Health Index (CHI) numbers [41], enabling linkage within the specific sectors using deterministic (exact) matching. The health and education data were then linked to each other via probabilistic matching of pupil census education records against the CHI database (population-wide register of all patients in NHS Scotland) using sex, date of birth, and postcode. Linked CHI numbers enabled further deterministic (exact) matching of education records to maternity, birth, and health visitor records. This study formed part of a larger programme of work, and the wider linkage process has been described previously [40,42].

Maternity data were obtained from the Scottish Morbidity Record 02 and the Scottish Birth Record, which record information on obstetric history, the pregnancy and delivery, as well as diagnoses, including congenital anomalies, and immediate outcomes of the offspring. The Scottish Birth Record provides additional information on the offspring up to discharge from hospital, including admission to a special or intensive care unit. The Child Health Pre-School Programme database contains information obtained during the routine child health reviews conducted by health visitors and school nurses [43], including feeding method and developmental progress or delays.

The School Pupil Census covers primary, secondary, and special education and is conducted annually. Completion is a statutory requirement of all local-authority, grant-aided, and special schools in Scotland [26]. The Census gathers aggregated data, such as numbers of pupils and teachers per class, as well as individual-level data including looked after status and SEN [44].

### **Inclusion criteria and definitions**

Inclusion in the study was restricted to all children who were born in Scotland from 2004 onwards, had complete breastfeeding data, and who attended a Scottish school at some point between 2009 and 2013 inclusive, defined as presence of the pupil on any of the relevant school censuses that are recorded annually every September shortly after the start of the school term. Because of difficulties accurately linking same-sex twins, the study was restricted to singletons. The exposure of interest was infant feeding method ascertained by the health visitor at 6 to 8 weeks of age, and children with missing exposure data were excluded. Feeding method was defined as the predominant method of feeding over the previous 24 hours and classified as (exclusive) breastfeeding, mixed (breastfeeding and formula) feeding, and formula feeding. The outcomes of interest were all-cause SEN and cause-specific SEN. SEN is defined as a requirement for educational arrangements and support above those which are normally provided [26]. SEN was derived from the School Pupil Census, and it is a statutory requirement of Scottish schools to identify, record, and support SEN [26]. Causes of SEN included learning disability, learning difficulty, sensory impairment, physical motor impairment, communication problems, ASD, social-emotional-behavioural difficulties, physical health problems, and mental health problems. These categories are not mutually exclusive; therefore, children can have more than one type of SEN. Children were included in the study regardless of SEN status. Potential confounders included as covariates in the models related to the child (sex, age at School Pupil Census, ethnic group, area-based deprivation quintile at birth), mother (maternal age, smoking status, and marital status), and pregnancy (parity, mode of delivery, sex gestation-specific birth weight centile, gestation at delivery, and 5-minute Apgar score).

### **Ethical approval and consent to participate**

Approval for the study was obtained from the Public Benefit and Privacy Panel of Public Health Scotland (reference 1920–0144). A data processing agreement was drafted between Glasgow University and Public Health Scotland and a data sharing agreement between Glasgow University and ScotXed. The NHS West of Scotland Research Ethics Service confirmed that formal NHS ethics approval was not required since the study involved anonymised extracts of routinely collected data with an acceptably negligible risk of identification.

### **Statistical analyses**

The characteristics of participants were summarised by feeding method using frequencies and percentages for categorical data and means and standard deviations for continuous data. The subgroups were compared using Pearson's  $\chi^2$  test,  $\chi^2$  test for trend, and analysis of variance as relevant. A child could be included in up to 5 School Pupil Censuses. We therefore examined the relationship between infant feeding method at 6 to 8 weeks of age and SEN on a yearly (rather than pupil) basis using generalised estimating equation (GEE) modelling, which took account of serial, correlated outcomes (SEN) relating to the same child across different school years [45]. Analysing the relationship between breastfeeding and SEN on a yearly basis treated each yearly observation as a separate relationship removing the issue of different lengths of follow-up for each child and accounting for changes in the exposure across years. Since these

outcomes were binary, the GEE analyses were performed with a binomial distribution and logit link function. The quasi-likelihood under the independence model criterion (QIC) was used to aid the choice of correlation structure [46]. The correlation structure with the lowest QIC value was utilised for all the GEE analyses. Separate models were run for all-cause SEN and each cause-specific SEN. The models were run univariately, partially adjusted (for child confounders) and fully adjusted (for child, maternal, and pregnancy confounders). We tested for statistical interactions between feeding method at 6 to 8 weeks of age, and child age, sex, and area deprivation.

Sensitivity analyses were conducted. The models were rerun excluding children with a congenital anomaly, defined as ICD10 codes Q00 to Q99, then excluding children admitted to special care baby units or intensive care units during the first 6 weeks of life. Data cleaning and analyses were conducted using R version 4.2.0 and Stata MP version 17. All analyses were conducted using a  $p$ -value of  $<0.05$  to determine statistical significance.

## Results

The original cohort after data cleaning comprised of 2,793,185 education records pertaining to 766,244 singleton school children born in Scotland and attending school in Scotland between 2009 and 2013. This reduced to 694,875 records pertaining to 238,171 children after limiting to children born on or after 2004. It reduced further to 555,593 records pertaining to 191,745 school children who had complete feeding information recorded at 6 to 8 weeks of age (Fig 1).

Of these 191,745 children, 126,907 (66.2%) were formula-fed, 48,473 (25.3%) were exclusively breastfed, and 16,365 (8.5%) were mixed-fed. All those children, regardless of age, had breastfeeding data, maternity data, and SEN data available. Breastfed children were more likely to be female, lived in more affluent areas, and had mothers who were older, less likely to smoke, and more likely to be married and parous (Table 1). They were less likely to be small for their gestational age, and more likely to be full term at delivery, have had a cephalic vaginal delivery and a 5-minute Apgar score of 7 to 10. The variables with the greatest amount of missing data were marital status (39.93%), smoking during pregnancy (13.99%), and pupil ethnicity (3.45%). However, missing values for these 3 variables were analysed as “unknown” categories and included in all analyses to minimise loss of records. The remaining variables were ordinal categories; therefore, including missing data as unknown categories did not make sense. However, these variables had lower levels of missing values: 5-minute Apgar score (2.81%), child deprivation quintile (2.53%), and parity (1.01%), with the remainder all less than 0.2%. Therefore, we did not deem multiple imputation to be necessary and instead used complete case analyses.

Overall, 23,141 (12.1%) children had a record of SEN: 8,878 (4.6%) had learning difficulties, 6,022 (3.1%) social emotional behavioural difficulties, 5,629 (2.9%) communication problems, 4,389 (2.3%) learning disabilities, 2,137 (1.1%) ASD, 1,749 (0.9%) physical motor impairments, 1,579 (0.8%) physical health problems, 1,223 (0.6%) sensory impairments, and 157 (0.1%) mental health problems. Numbers and percentages of these outcomes by specific feeding type are presented in Table 2.

Compared with children who were formula-fed, we observed that children who were mixed-fed (OR 0.70, 95% CI [0.66,0.74],  $p < 0.001$ ) and children who were exclusively breastfed (OR 0.59 (95% CI [0.57,0.61],  $p < 0.001$ ) were both less likely to have all-cause SEN on univariate analysis. Following adjustment for child, maternal, and pregnancy confounders, the associations were attenuated but remained significant (mixed feeding OR 0.90, 95% CI [0.84,0.95],  $p < 0.001$  and exclusive breast-feeding OR 0.78, 95% CI [0.75,0.82],  $p < 0.001$ ) (Table 3).

Compared with children who were formula-fed, we observed that children who were mixed-fed or were exclusively breastfed were less likely to have learning disabilities (mixed

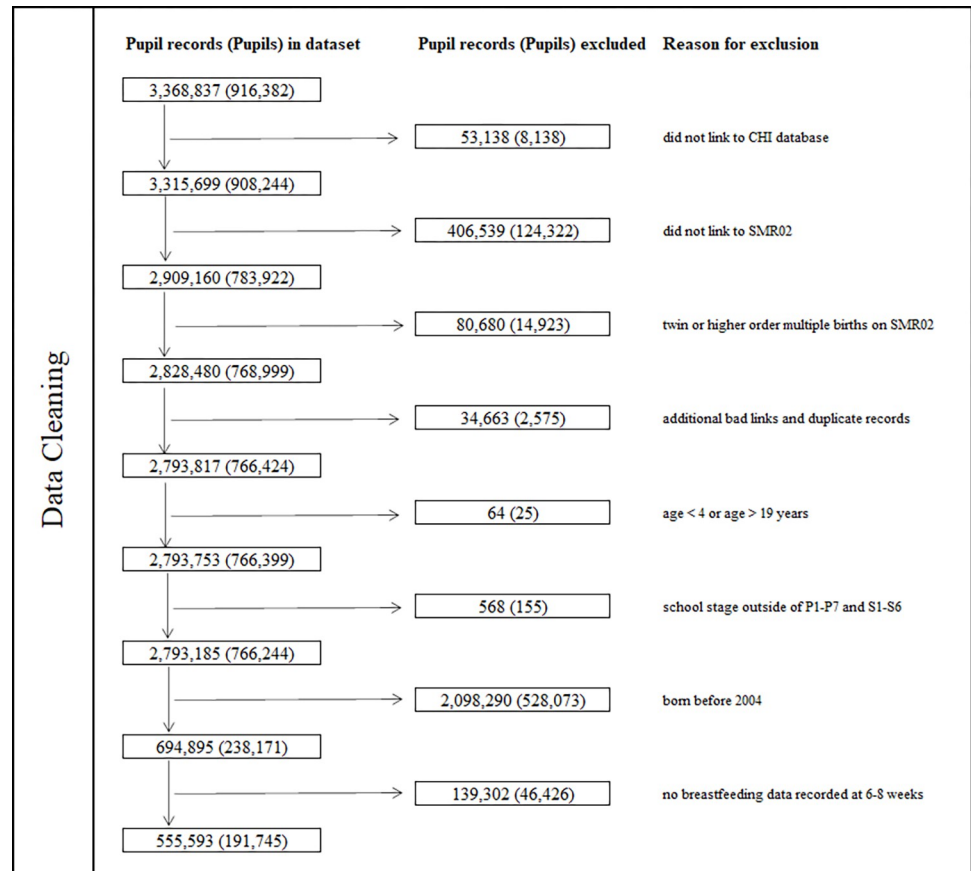

**Fig 1. Flow diagram presenting the number of records and pupils excluded at each stage of data cleaning.** CHI, Community Health Index; P1–P7 primary 1 through primary 7; SMR, Scottish Morbidity Record; S1–S6, secondary 1 through secondary 6.

<https://doi.org/10.1371/journal.pmed.1004191.g001>

feeding OR 0.75, 95% CI [0.65,0.87],  $p < 0.001$  and exclusive breastfeeding OR 0.66, 95% CI [0.59,0.74],  $p < 0.001$ , or learning difficulties (mixed feeding OR 0.85, 95% CI [0.77,0.94],  $p = 0.001$  and exclusive breastfeeding OR 0.75, 95% CI [0.70,0.81],  $p < 0.001$ ). Compared with children who were formula-fed, we observed that children who were exclusively breastfed were less likely to have communication problems (OR 0.81, 95% CI [0.74,0.88],  $p < 0.001$ ), social–emotional–behavioural difficulties (OR 0.77, 95% CI [0.70,0.84],  $p < 0.001$ ), sensory impairments (OR 0.79, 95% CI [0.65,0.95],  $p = 0.01$ ), physical motor disabilities (OR 0.78, 95% CI [0.66,0.91],  $p = 0.002$ ), and physical health conditions (OR 0.74, 95% CI [0.63,0.87],  $p < 0.001$ ) after adjusting for potential confounders. Feeding method was not significantly associated with ASD or mental health conditions (Table 3).

No statistically significant interactions between feeding method and either pupil sex, pupil age, or pupil socioeconomic status were identified. Furthermore, exclusion of the 7,533 children who had a congenital abnormality and exclusion of the 13,193 children who were admitted to intensive care or special care baby units did not alter the findings (S1 Table).

## Discussion

In this study, we observed that compared to children who were formula-fed, exclusively breastfed children had less risk of all-cause SEN and SEN attributed to learning disabilities,

Table 1. Child, maternal, and pregnancy characteristics by feeding method at 6–8 weeks of age.

|                                            | Formula feeding<br>N = 126,907 |      | Mixed feeding<br>N = 16,365 |      | Breastfeeding<br>N = 48,473 |      | P value             |
|--------------------------------------------|--------------------------------|------|-----------------------------|------|-----------------------------|------|---------------------|
|                                            | mean                           | SD   | mean                        | SD   | mean                        | SD   |                     |
| Age at Census (years)                      | 6.0                            | 0.8  | 6.0                         | 0.8  | 6.0                         | 0.8  | <0.001 <sup>1</sup> |
|                                            | N                              | %    | N                           | %    | N                           | %    |                     |
| Sex                                        |                                |      |                             |      |                             |      |                     |
| Male                                       | 65,333                         | 51.5 | 8,598                       | 52.5 | 23,933                      | 49.4 | <0.001 <sup>2</sup> |
| Female                                     | 61,574                         | 48.5 | 7,767                       | 47.5 | 24,540                      | 50.6 |                     |
| Deprivation quintile at birth              |                                |      |                             |      |                             |      |                     |
| 1 (most deprived)                          | 45,115                         | 35.6 | 2,970                       | 18.2 | 6,898                       | 14.3 | <0.001 <sup>3</sup> |
| 2                                          | 30,542                         | 24.1 | 3,113                       | 19.1 | 8,364                       | 17.3 |                     |
| 3                                          | 21,481                         | 17.0 | 3,165                       | 19.4 | 9,707                       | 20.1 |                     |
| 4                                          | 16,767                         | 13.2 | 3,533                       | 21.6 | 11,180                      | 23.1 |                     |
| 5 (least deprived)                         | 12,787                         | 10.1 | 3,556                       | 21.8 | 12,237                      | 25.3 |                     |
| Missing                                    | 215                            |      | 28                          |      | 87                          |      |                     |
| Ethnic group                               |                                |      |                             |      |                             |      |                     |
| White                                      | 118,380                        | 96.7 | 13,609                      | 86.4 | 43,140                      | 91.9 | <0.001 <sup>4</sup> |
| Asian                                      | 2,619                          | 2.1  | 1,420                       | 9.0  | 2,118                       | 4.5  |                     |
| Black                                      | 242                            | 0.2  | 309                         | 2.0  | 509                         | 1.1  |                     |
| Other                                      | 231                            | 0.2  | 131                         | 0.8  | 292                         | 0.6  |                     |
| Mixed                                      | 981                            | 0.8  | 285                         | 1.8  | 866                         | 1.8  |                     |
| Missing                                    | 4,454                          |      | 611                         |      | 1,548                       |      |                     |
| Maternal age (years)                       |                                |      |                             |      |                             |      |                     |
| <24                                        | 44,865                         | 35.4 | 2,361                       | 14.4 | 5,725                       | 11.8 | <0.001 <sup>3</sup> |
| 25–29                                      | 32,974                         | 26.0 | 4,003                       | 24.5 | 11,496                      | 23.7 |                     |
| 30–34                                      | 29,727                         | 23.4 | 5,538                       | 33.8 | 17,541                      | 36.2 |                     |
| ≥35                                        | 19,341                         | 15.2 | 4,463                       | 27.3 | 13,711                      | 28.3 |                     |
| Maternal smoking                           |                                |      |                             |      |                             |      |                     |
| No                                         | 74,208                         | 68.8 | 12,402                      | 87.1 | 38,914                      | 90.8 | <0.001 <sup>2</sup> |
| Yes                                        | 33,608                         | 31.2 | 1,837                       | 12.9 | 3,955                       | 9.2  |                     |
| Missing                                    | 19,091                         |      | 2,126                       |      | 5,604                       |      |                     |
| Parity                                     |                                |      |                             |      |                             |      |                     |
| 0                                          | 59,361                         | 47.2 | 7,915                       | 49.0 | 21,158                      | 44.2 | <0.001 <sup>3</sup> |
| 1                                          | 41,474                         | 33.0 | 5,272                       | 32.6 | 16,859                      | 35.2 |                     |
| >1                                         | 24,907                         | 19.8 | 2,976                       | 18.4 | 9,877                       | 20.6 |                     |
| Missing                                    | 1,165                          |      | 202                         |      | 579                         |      |                     |
| Marital status                             |                                |      |                             |      |                             |      |                     |
| Married                                    | 25,858                         | 34.2 | 5,636                       | 56.7 | 18,158                      | 61.5 |                     |
| Single                                     | 43,970                         | 58.1 | 3,665                       | 36.9 | 9,542                       | 32.3 | <0.001 <sup>4</sup> |
| Other                                      | 5,866                          | 7.7  | 636                         | 6.4  | 1,848                       | 6.2  |                     |
| Missing                                    | 51,213                         |      | 6,428                       |      | 18,925                      |      |                     |
| Mode of delivery                           |                                |      |                             |      |                             |      |                     |
| Vaginal cephalic                           | 95,504                         | 75.3 | 11,866                      | 72.5 | 37,469                      | 77.3 | <0.001 <sup>4</sup> |
| Vaginal breech                             | 318                            | 0.3  | 29                          | 0.2  | 87                          | 0.2  |                     |
| Elective CS                                | 12,159                         | 9.6  | 1,685                       | 10.3 | 4,303                       | 8.9  |                     |
| Emergency CS                               | 18,894                         | 14.9 | 2,778                       | 17.0 | 6,597                       | 13.6 |                     |
| Other                                      | 32                             | 0.0  | 7                           | 0.0  | 17                          | 0.0  |                     |
| Sex gestation-specific birthweight centile |                                |      |                             |      |                             |      |                     |

(Continued)



Table 1. (Continued)

|                               | Formula feeding<br>N = 126,907 |      | Mixed feeding<br>N = 16,365 |      | Breastfeeding<br>N = 48,473 |      | P value             |
|-------------------------------|--------------------------------|------|-----------------------------|------|-----------------------------|------|---------------------|
|                               | mean                           | SD   | mean                        | SD   | mean                        | SD   |                     |
| 1–3                           | 5,794                          | 4.6  | 551                         | 3.4  | 1,183                       | 2.4  | <0.001 <sup>3</sup> |
| 4–10                          | 11,951                         | 9.4  | 1,289                       | 7.9  | 3,244                       | 6.7  |                     |
| 11–20                         | 15,458                         | 12.2 | 1,780                       | 10.9 | 4,988                       | 10.3 |                     |
| 21–80                         | 73,367                         | 57.8 | 9,576                       | 58.6 | 29,622                      | 61.2 |                     |
| 81–90                         | 10,474                         | 8.3  | 1,631                       | 10.0 | 4,851                       | 10.0 |                     |
| 91–97                         | 6,613                          | 5.2  | 1,059                       | 6.5  | 3,193                       | 6.6  |                     |
| 98–100                        | 3,057                          | 2.4  | 460                         | 2.8  | 1,330                       | 2.7  |                     |
| Missing                       | 193                            |      | 19                          |      | 62                          |      |                     |
| Gestation at delivery (weeks) |                                |      |                             |      |                             |      |                     |
| <28                           | 174                            | 0.1  | 25                          | 0.2  | 22                          | 0.0  | <0.001 <sup>3</sup> |
| 28–32                         | 1,240                          | 1.0  | 128                         | 0.8  | 152                         | 0.3  |                     |
| 33–36                         | 6,734                          | 5.3  | 705                         | 4.3  | 1,483                       | 3.1  |                     |
| 37                            | 6,667                          | 5.3  | 754                         | 4.6  | 1,993                       | 4.1  |                     |
| 38                            | 16,225                         | 12.8 | 1,985                       | 12.1 | 5,402                       | 11.1 |                     |
| 39                            | 28,008                         | 22.1 | 3,751                       | 22.9 | 10,652                      | 22.0 |                     |
| 40                            | 36,096                         | 28.5 | 4,683                       | 28.6 | 14,944                      | 30.8 |                     |
| 41                            | 28,198                         | 22.2 | 3,787                       | 23.2 | 12,214                      | 25.2 |                     |
| 42                            | 3,333                          | 2.6  | 525                         | 3.2  | 1,539                       | 3.2  |                     |
| >42                           | 158                            | 0.1  | 14                          | 0.1  | 54                          | 0.1  |                     |
| Missing                       | 73                             |      | 8                           |      | 18                          |      |                     |
| 5-minute Apgar score          |                                |      |                             |      |                             |      |                     |
| 1–3                           | 443                            | 0.4  | 60                          | 0.4  | 131                         | 0.3  | <0.001 <sup>3</sup> |
| 4–6                           | 1,264                          | 1.0  | 138                         | 0.9  | 355                         | 0.8  |                     |
| 7–10                          | 121,665                        | 98.6 | 15,677                      | 98.8 | 46,622                      | 99.0 |                     |
| Missing                       | 3,535                          |      | 490                         |      | 1,365                       |      |                     |

CS, cesarean section; N, number; SD, standard deviation.

<sup>1</sup>Produced using analysis of variance (ANOVA).

<sup>2</sup>Produced using chi-squared test for trend.

<sup>3</sup>Produced using Spearman rank order correlation.

<sup>4</sup>Produced using chi-squared test for association.

<https://doi.org/10.1371/journal.pmed.1004191.t001>

learning difficulties, communication problems, social–emotional–behavioural difficulties, sensory impairments, physical motor disabilities, and physical health conditions after adjusting for available sociodemographic and maternity factors. Compared to children who were formula-fed, those who were mixed-fed also appeared to be less likely to have all cause SEN and SEN attributed to learning disabilities or learning difficulties.

Our findings concur with a previous case–control study in which 49 individuals aged 13 to 22 years who were receiving additional learning support for presumed cognitive difficulties were less likely to have been breastfed on discharge from hospital than their siblings and an unrelated control group [35]. Our finding that breastfeeding was associated with less communication problems is consistent with the findings in previous studies [18,19]. Social–emotional–behavioural problems have also been examined previously, but with both exclusive and nonexclusive breastfeeding being found to be protective, in contrast to our findings [17,22]. Surprisingly, our study found no significant relationship between either breastfeeding or

**Table 2. Proportion of children with all-cause SEN and cause-specific SEN by feeding method at 6–8 weeks of age.**

|                                                               | Formula feeding |        | Mixed feeding |        | Exclusive Breastfeeding |        | P value <sup>1</sup> |
|---------------------------------------------------------------|-----------------|--------|---------------|--------|-------------------------|--------|----------------------|
|                                                               | N = 126,907     |        | N = 16,365    |        | N = 48,473              |        |                      |
|                                                               | n               | Col. % | n             | Col. % | n                       | Col. % |                      |
| All-Cause SEN                                                 |                 |        |               |        |                         |        |                      |
| No                                                            | 109,492         | 86.3   | 14,750        | 90.1   | 44,362                  | 91.5   | <0.001               |
| Yes                                                           | 17,415          | 13.7   | 1,615         | 9.9    | 4,111                   | 8.5    |                      |
| Cause-Specific SEN: Learning disability                       |                 |        |               |        |                         |        |                      |
| No                                                            | 123,446         | 97.3   | 16,092        | 98.3   | 47,818                  | 98.6   | <0.001               |
| Yes                                                           | 3,461           | 2.7    | 273           | 1.7    | 655                     | 1.4    |                      |
| Cause-Specific SEN: Learning difficulty                       |                 |        |               |        |                         |        |                      |
| No                                                            | 120,145         | 94.7   | 15,785        | 96.5   | 46,937                  | 96.8   | <0.001               |
| Yes                                                           | 6,762           | 5.3    | 580           | 3.5    | 1,536                   | 3.2    |                      |
| Cause-Specific SEN: Sensory impairment                        |                 |        |               |        |                         |        |                      |
| No                                                            | 126,013         | 99.3   | 16,260        | 99.4   | 48,249                  | 99.5   | <0.001               |
| Yes                                                           | 894             | 0.7    | 105           | 0.6    | 224                     | 0.5    |                      |
| Cause-Specific SEN: Physical motor impairment                 |                 |        |               |        |                         |        |                      |
| No                                                            | 125,638         | 99.0   | 16,218        | 99.1   | 48,140                  | 99.3   | <0.001               |
| Yes                                                           | 1,269           | 1.0    | 147           | 0.9    | 333                     | 0.7    |                      |
| Cause-Specific SEN: Communication problems                    |                 |        |               |        |                         |        |                      |
| No                                                            | 122,757         | 96.7   | 15,947        | 97.4   | 47,412                  | 97.8   | <0.001               |
| Yes                                                           | 4,150           | 3.3    | 418           | 2.6    | 1,061                   | 2.2    |                      |
| Cause-Specific SEN: ASD                                       |                 |        |               |        |                         |        |                      |
| No                                                            | 125,398         | 98.8   | 16,179        | 98.9   | 48,031                  | 99.1   | <0.001               |
| Yes                                                           | 1,509           | 1.2    | 186           | 1.1    | 442                     | 0.9    |                      |
| Cause-Specific SEN: Social-emotional-behavioural difficulties |                 |        |               |        |                         |        |                      |
| No                                                            | 122,142         | 96.2   | 15,981        | 97.7   | 47,600                  | 98.2   | <0.001               |
| Yes                                                           | 4,765           | 3.8    | 384           | 2.3    | 873                     | 1.8    |                      |
| Cause-Specific SEN: Physical health problem                   |                 |        |               |        |                         |        |                      |
| No                                                            | 125,723         | 99.1   | 16,245        | 99.3   | 48,198                  | 99.4   | <0.001               |
| Yes                                                           | 1,184           | 0.9    | 120           | 0.7    | 275                     | 0.6    |                      |
| Cause-Specific SEN: Mental health problem                     |                 |        |               |        |                         |        |                      |
| No                                                            | 126,785         | 99.9   | 16,354        | 99.9   | 48,449                  | 100.0  | 0.002                |
| Yes                                                           | 122             | 0.1    | 11            | 0.1    | 24                      | 0.0    |                      |

ASD, autism spectrum disorder; Col % column percentage; SEN, special educational need.

<sup>1</sup>Produced using chi-squared test for trend.

<https://doi.org/10.1371/journal.pmed.1004191.t002>

mixed feeding and ASD. This conflicts with two previous meta-analyses that both reported that breastfeeding was protective against ASD [14,15]. This may be due to our study including less severe cases in which the association may be weaker or nonexistent.

Congenital anomalies can impact on infant feeding choices [47–49], as well as predisposing to SEN [36,50]. Similarly, admission to intensive care and special care baby units can impact feeding choice [51–53] and is associated with SEN [35]. Many previous studies have included children with congenital anomalies or those admitted into neonatal units but not adjusted for these as potential confounders [8,32,33,36,38,39]. In our study, we observed that the association between breastfeeding and reduced risk of SEN was present among children who did not have congenital anomalies and among children not admitted to intensive care or special care baby units. However, a limitation of our study was lack of data on specific lengths of stay in intensive care or special care baby units.

**Table 3. Univariate and multivariate associations between infant feeding method at 6–8 weeks of age and all-cause and cause-specific SEN.**

|                                                  | Univariate<br>N = 191,745 children (555,593 records) |           |         | Adjusted for child confounders<br>N = 191,415 children (554,621 records) |           |         | Adjusted for child, maternal and pregnancy confounders<br>N = 183,881 children (528,554 records) |           |         |
|--------------------------------------------------|------------------------------------------------------|-----------|---------|--------------------------------------------------------------------------|-----------|---------|--------------------------------------------------------------------------------------------------|-----------|---------|
|                                                  | OR                                                   | 95% CI    | p-value | OR                                                                       | 95% CI    | p-value | OR                                                                                               | 95% CI    | p-value |
| <b>All-cause SEN</b>                             |                                                      |           |         |                                                                          |           |         |                                                                                                  |           |         |
| Formula                                          | 1.00                                                 |           |         | 1.00                                                                     |           |         | 1.00                                                                                             |           |         |
| Mixed                                            | 0.70                                                 | 0.66–0.74 | <0.001  | 0.79                                                                     | 0.74–0.84 | <0.001  | 0.90                                                                                             | 0.84–0.95 | <0.001  |
| Breast                                           | 0.59                                                 | 0.57–0.61 | <0.001  | 0.68                                                                     | 0.66–0.71 | <0.001  | 0.78                                                                                             | 0.75–0.82 | <0.001  |
| <b>Learning disability</b>                       |                                                      |           |         |                                                                          |           |         |                                                                                                  |           |         |
| Formula                                          | 1.00                                                 |           |         | 1.00                                                                     |           |         | 1.00                                                                                             |           |         |
| Mixed                                            | 0.62                                                 | 0.54–0.71 | <0.001  | 0.68                                                                     | 0.59–0.78 | <0.001  | 0.75                                                                                             | 0.65–0.87 | <0.001  |
| Breast                                           | 0.50                                                 | 0.46–0.55 | <0.001  | 0.59                                                                     | 0.53–0.65 | <0.001  | 0.66                                                                                             | 0.59–0.74 | <0.001  |
| <b>Learning difficulty</b>                       |                                                      |           |         |                                                                          |           |         |                                                                                                  |           |         |
| Formula                                          | 1.00                                                 |           |         | 1.00                                                                     |           |         | 1.00                                                                                             |           |         |
| Mixed                                            | 0.65                                                 | 0.59–0.72 | <0.001  | 0.74                                                                     | 0.67–0.82 | <0.001  | 0.85                                                                                             | 0.77–0.94 | 0.001   |
| Breast                                           | 0.57                                                 | 0.54–0.61 | <0.001  | 0.65                                                                     | 0.61–0.70 | <0.001  | 0.75                                                                                             | 0.70–0.81 | <0.001  |
| <b>Communication problems</b>                    |                                                      |           |         |                                                                          |           |         |                                                                                                  |           |         |
| Formula                                          | 1.00                                                 |           |         | 1.00                                                                     |           |         | 1.00                                                                                             |           |         |
| Mixed                                            | 0.82                                                 | 0.73–0.92 | <0.001  | 0.85                                                                     | 0.76–0.96 | 0.008   | 0.94                                                                                             | 0.83–1.06 | 0.312   |
| Breast                                           | 0.66                                                 | 0.61–0.71 | <0.001  | 0.73                                                                     | 0.67–0.79 | <0.001  | 0.81                                                                                             | 0.74–0.88 | <0.001  |
| <b>Social–emotional–behavioural difficulties</b> |                                                      |           |         |                                                                          |           |         |                                                                                                  |           |         |
| Formula                                          | 1.00                                                 |           |         | 1.00                                                                     |           |         | 1.00                                                                                             |           |         |
| Mixed                                            | 0.61                                                 | 0.54–0.69 | <0.001  | 0.77                                                                     | 0.68–0.88 | <0.001  | 0.96                                                                                             | 0.85–1.09 | 0.541   |
| Breast                                           | 0.46                                                 | 0.42–0.50 | <0.001  | 0.61                                                                     | 0.56–0.66 | <0.001  | 0.77                                                                                             | 0.70–0.84 | <0.001  |
| <b>Autistic spectrum disorder</b>                |                                                      |           |         |                                                                          |           |         |                                                                                                  |           |         |
| Formula                                          | 1.00                                                 |           |         | 1.00                                                                     |           |         | 1.00                                                                                             |           |         |
| Mixed                                            | 1.01                                                 | 0.85–1.21 | 0.870   | 1.05                                                                     | 0.88–1.26 | 0.581   | 1.01                                                                                             | 0.84–1.22 | 0.903   |
| Breast                                           | 0.83                                                 | 0.74–0.94 | 0.003   | 0.93                                                                     | 0.82–1.06 | 0.291   | 0.88                                                                                             | 0.77–1.01 | 0.074   |
| <b>Sensory impairment</b>                        |                                                      |           |         |                                                                          |           |         |                                                                                                  |           |         |
| Formula                                          | 1.00                                                 |           |         | 1.00                                                                     |           |         | 1.00                                                                                             |           |         |
| Mixed                                            | 0.94                                                 | 0.75–1.19 | 0.601   | 0.97                                                                     | 0.77–1.23 | 0.816   | 1.07                                                                                             | 0.84–1.37 | 0.579   |
| Breast                                           | 0.63                                                 | 0.54–0.75 | <0.001  | 0.66                                                                     | 0.56–0.79 | <0.001  | 0.79                                                                                             | 0.65–0.95 | 0.010   |
| <b>Physical motor disability</b>                 |                                                      |           |         |                                                                          |           |         |                                                                                                  |           |         |
| Formula                                          | 1.00                                                 |           |         | 1.00                                                                     |           |         | 1.00                                                                                             |           |         |
| Mixed                                            | 0.86                                                 | 0.71–1.05 | 0.144   | 0.91                                                                     | 0.74–1.11 | 0.350   | 0.97                                                                                             | 0.78–1.19 | 0.754   |
| Breast                                           | 0.68                                                 | 0.60–0.79 | <0.001  | 0.72                                                                     | 0.62–0.83 | <0.001  | 0.78                                                                                             | 0.66–0.91 | 0.002   |
| <b>Physical health condition</b>                 |                                                      |           |         |                                                                          |           |         |                                                                                                  |           |         |
| Formula                                          | 1.00                                                 |           |         | 1.00                                                                     |           |         | 1.00                                                                                             |           |         |
| Mixed                                            | 0.84                                                 | 0.68–1.04 | 0.109   | 0.92                                                                     | 0.74–1.14 | 0.445   | 0.93                                                                                             | 0.74–1.16 | 0.504   |
| Breast                                           | 0.63                                                 | 0.54–0.73 | <0.001  | 0.70                                                                     | 0.60–0.81 | <0.001  | 0.74                                                                                             | 0.63–0.87 | <0.001  |
| <b>Mental health condition</b>                   |                                                      |           |         |                                                                          |           |         |                                                                                                  |           |         |
| Formula                                          | 1.00                                                 |           |         | 1.00                                                                     |           |         | 1.00                                                                                             |           |         |
| Mixed                                            | 0.51                                                 | 0.26–1.02 | 0.056   | 0.61                                                                     | 0.31–1.21 | 0.156   | 0.74                                                                                             | 0.36–1.53 | 0.421   |
| Breast                                           | 0.40                                                 | 0.25–0.65 | <0.001  | 0.47                                                                     | 0.29–0.77 | 0.002   | 0.58                                                                                             | 0.33–1.03 | 0.061   |

CI, confidence interval; OR, odds ratio; SEN, special educational need.

Adjusted for child (sex, age at school pupil census, ethnic group, area-based deprivation quintile at birth), mother (maternal age, smoking status, and marital status), and pregnancy (parity, mode of delivery, sex gestation-specific birth weight centile, gestation at delivery, and 5-minute Apgar score) factors.

<https://doi.org/10.1371/journal.pmed.1004191.t003>

Children who were born in private hospitals, privately educated, or homeschooled were not included in the study. However, only 4% of children in Scotland attend an independent school [54], and homeschooling and private maternity care are very uncommon [55]. Because of the need to link birth and education records, we could not include children who were not born in Scotland or who emigrated from Scotland before starting school.

Previous studies on breastfeeding and SEN have analysed smaller study populations [35,36] and been prone to selection bias [8,38], recall bias [8,33,34,36,38], and loss to follow-up. Use of national routine data enabled us to conduct a large-scale, unselective study that included hard-to-reach groups. Since both exposure and outcome data were collected routinely by the health and education sectors, recall bias was avoided.

Many previous studies have analysed feeding method as a binary variable [32,33,35]. We were additionally able to investigate children who were mixed-fed. While self-reported feeding method was based on predominant feeding method in the preceding 24 hours and was therefore not affected by recall bias, it was not corroborated and therefore could not differentiate infants who had never been breastfed from those in whom it had been discontinued prior to 6 weeks. Scottish data show that rates of breastfeeding drop off between first visit, 6- to 8-week review, and 13- to 15-month review [56]. Therefore, status at 6 to 8 weeks gives a snapshot picture but cannot be applied to wider time points. We also did not have information on the type of formula feed, whether any children received donor milk, or use of expressed breast milk. The latter is important since skin-to-skin contact increases maternal bonding and is beneficial for cognition [30,31].

Health visitors are funded by the National Health Service, which is free to the whole population at the point of delivery. The Scottish Government's core programme of child health reviews and screening activities are a universal process that are offered to every child. Beyond core contacts, the health visitor uses professional judgement to decide on further contacts. While there is no legal requirement to have a child health review, and it is not mandatory that mothers accept a child health visit, recent data from Public Health Scotland show that 97% of children successfully receive their first child review (in the days after birth) and 90% successfully receive their 6- to 8-week review with uptake similar across different ethnic groups, maternal ages, and deprivation categories. [57] In our study, based on older data, around 20% of pupil records had no 6- to 8-week review data; however, this figure was similar regardless of mother's maternal age, or pupil's ethnicity or deprivation, suggesting that missing data on more vulnerable groups of children is unlikely. Indeed, the percentage of missing data was least among most deprived children and children of Asian ethnicity.

The risk of incomplete or inaccurate data inherent in secondary data analysis was mitigated by the recording of SEN being a statutory requirement. Prevalence of SEN increased over the duration of the study from 2% to 12% and has continued to increase in recent years. This increase can be largely attributed to increased ascertainment of conditions such as ASD and ADHD due to greater awareness among parents and teachers. Since the observed increase was similar irrespective of exposure group, it is unlikely to have introduced bias. We also adjusted all of our analyses for pupil age. The requirement for SEN is decided by the teacher, and the school's special educational needs coordinator (SENCO) in discussion with the child's parents or guardians, taking account of formal and informal assessments and wider information about progress and desired outcomes. The additional support put in place can vary significantly and is dependent on the individual child's requirements [3]. The categories for the cause-specific SENs are completed within the education sector, and the person deciding on what is recorded can vary from teacher to medical professional to support staff such as an educational psychologist. It is possible that some children with needs will not meet the threshold to be formally offered support while others may have difficulties that are not picked up. The study was

retrospective and used administrative data. Therefore, it is not possible to verify that ascertainment of SEN was 100% complete as this would require prospective recruitment and examination/investigation of all children. However, likelihood of complete ascertainment is increased due to the benefits of formal diagnoses, the legal requirements to identify and record SEN, and the fact that ascertainment can be triggered by teachers, parents, and healthcare workers. Furthermore, there is no reason to believe that ascertainment is likely to differ systematically by breastfeeding history, and, therefore, that bias was introduced.

The results of this study were obtained based on Scottish data. Rates of breastfeeding, however, vary greatly across the United Kingdom, Europe, and worldwide. It has been reported that overall prevalence of breastfeeding varies from 30.7% in high-income countries to over 90% in low- and middle-income countries [58]. This makes it difficult to generalize our findings to low- and middle-income countries. Our observed breastfeeding rate of 33.8% (either exclusive or mixed breastfeeding) agrees broadly with rates reported across high-income countries.

We had access to several potential confounders not available in some previous studies [8,35–37,39], but, as with any observational study, residual confounding is possible. We did not have any data on important maternal or paternal factors such as education level [59,60], intelligence quotient (IQ) [61], employment status, race/ethnicity, or mental and physical health; however, we did adjust for the mother's area socioeconomic status at the time of birth, which is a proxy measure. One of the most frequently seen confounders within the literature is parental education or intelligence level. Children born to mothers or fathers who are more educated or have a higher IQ appear to have lower likelihood of the most common cause of SEN—learning difficulties [59,60,62]. There is also evidence that parents who have reached higher education levels are more likely to breastfeed [63,64]. Other sociodemographic factors may also act as confounders in the relationship. Older mothers, those from Black and Minority ethnic groups, those who are married or cohabiting, and those in higher socioeconomic classes have been reported to be more likely to breastfeed [63,65]. Some of these characteristics are also associated with intellectual problems. For example, it has been stated that divorced or single mothers are more likely to have children with cognitive delay [66]; children from families with a higher socioeconomic position are more likely to do better academically [60,67]; and, among late and moderately preterm children, non-white ethnicity is a significant risk factor for cognitive impairment [35]. Our data agreed with previous literature with respect to breastfeeding rates being lower among younger and more deprived mothers. The reasons for these patterns should be explored in more detail.

There are several areas where further research would be beneficial. Firstly, being able to examine the impact of duration of different feeding types on all-cause and cause-specific SEN in a large population cohort such as this would provide insights into any dose–response relationships that may be present, and whether there are any critical feeding durations. Furthermore, research regarding expressed breast milk versus breastfeeding on a large representative sample would enhance understanding of whether it is the act of breastfeeding, or breast milk itself that impacts upon SEN. Finally, with regard to the exposure, it would be useful to know whether the relationship between feeding and SEN is maintained for different types of formula feed, as well as donor milk compared with mother's milk.

Residual confounding could be responsible for the observed associations in this study, and so performing the same methodology on a large sample with a greater number of confounders is also recommended, particularly including confounders that were not included in this study due to lack of data such as maternal IQ, parental education level and occupation, and alcohol or drug use during pregnancy.

Future studies are also required to investigate whether the impact of neonatal stays on the relationship between mixed feeding and SEN applies for all lengths of neonatal stay. Unfortunately, this was not possible to conduct within this piece of research due to lack of available data around length of stay. Finally, there has been some research that suggests that breastfeeding is linked to reduced hospitalisation and reduced chronic disease in childhood [12,68–70]. Certain chronic diseases have also been associated with SEN [71–74]. There is the possibility, therefore, that childhood chronic disease acts as a mediator between feeding method in infancy and SEN, and so further research is required to examine this relationship.

In conclusion, breastfeeding may be protective against children developing SEN. While exclusive breastfeeding is the ideal, even mixed feeding may confer some benefit. The results of this study suggest that feeding method in infancy could be a modifiable risk factor for all-cause SEN, which has the potential to help reduce its burden in relation to the affected children, their families, and wider society. We observed that, compared to formula-fed children, children who were breastfed and children who were mixed-fed at 6 to 8 weeks had lower risk of all-cause SEN, and SEN attributed to learning disabilities and learning difficulty. This is significant as many women struggle to exclusively breastfeed for the full 6 months recommended by WHO [10] for a host of different reasons [11]. However, this study provides evidence that even a short duration of nonexclusive breastfeeding could be beneficial with regard to development of SEN. Our findings augment the existing evidence base concerning the advantages of breastfeeding and reinforce the importance of breastfeeding education and support. Several meta-analyses have been conducted examining the effectiveness of breastfeeding education and support programmes, and these all concluded that the programmes were beneficial as regards increasing the initiation and duration of breastfeeding [75,76]. Despite breastfeeding rates increasing in recent years, the rates in Scotland vary by maternal age, socioeconomic status, and education level and are lower than rates in England [56]. Policies such as Scotland's 2019 published recommendations to make the country breastfeeding friendly [77] should therefore remain at the forefront of political and public health agendas.

## Supporting information

**S1 Table. Multivariate associations between infant feeding method at 6–8 weeks of age and all-cause and cause-specific special educational need after excluding children with a congenital abnormality and children who were admitted to intensive or special care units.**

ASD, autistic spectrum disorder; Col. %, column percentage; OR, odds ratio. Adjusted for child (sex, age at school pupil census, ethnic group, area-based deprivation quintile at birth), mother (maternal age, smoking status, and marital status), and pregnancy (parity, mode of delivery, sex gestation-specific birth weight centile, gestation at delivery, and 5-minute Apgar score) factors.

(DOCX)

**S1 STROBE Checklist. STROBE Statement—Checklist of items that should be included in reports of observational studies.**

(DOCX)

## Author Contributions

**Conceptualization:** Michael Fleming.

**Data curation:** David Clark, Albert King, Michael Fleming.

**Formal analysis:** Lisa J. Adams, Michael Fleming.

**Funding acquisition:** Michael Fleming.

**Investigation:** Lisa J. Adams, Michael Fleming.

**Methodology:** Lisa J. Adams, Jill P. Pell, Daniel F. Mackay, Michael Fleming.

**Project administration:** Michael Fleming.

**Supervision:** Jill P. Pell, Michael Fleming.

**Validation:** Michael Fleming.

**Writing – original draft:** Lisa J. Adams, Jill P. Pell, Michael Fleming.

**Writing – review & editing:** Lisa J. Adams, Jill P. Pell, Daniel F. Mackay, David Clark, Albert King, Michael Fleming.

## References

1. The Educational Institute of Scotland. Additional Support for Learning in Scottish school education: Exploring the gap between promise and practice. 2019. Available from: <https://www.eis.org.uk/Content/images/education/ASN/ExploringTheGap.pdf> [cited 2023 Jan 23].
2. Scottish Government. Schools in Scotland—summary statistics. 2020. Available from: <https://www.gov.scot/publications/summary-statistics-schools-scotland-2020/pages/5/> [cited 2023 Jan 23].
3. Department of Education, Department of Health. Special educational needs and disability code of practice: 0 to 25 years. 2014. Available from: <https://www.gov.uk/government/publications/send-code-of-practice-0-to-25> [cited 2023 Jan 23].
4. Parsons S, Platt L. The early academic progress of children with special educational needs. *Br Educ Res J*. 2017; 43(3):466–485.
5. Department for Education. Children with Special Educational Needs 2010: an analysis. 2010. Available from: [https://assets.publishing.service.gov.uk/government/uploads/system/uploads/attachment\\_data/file/175411/DFE-00553-2010.pdf](https://assets.publishing.service.gov.uk/government/uploads/system/uploads/attachment_data/file/175411/DFE-00553-2010.pdf) [cited 2023 Jan 23].
6. Sullivan PM, Knutson JF. Maltreatment and disabilities: a population-based epidemiological study. *Child Abuse Negl*. 2000; 24(10):1257–1273. [https://doi.org/10.1016/S0145-2134\(00\)00190-3](https://doi.org/10.1016/S0145-2134(00)00190-3) PMID: 11075694
7. Department for Children S and F. Bullying Involving Children with Special Educational Needs and Disabilities Safe to Learn: Embedding anti-bullying work in schools. 2008.
8. Gore N, Emerson E, Brady S. Rates of breastfeeding and exposure to socio-economic adversity amongst children with intellectual disability. *Res Dev Disabil*. 2015; 39:12–19. <https://doi.org/10.1016/j.ridd.2014.12.028> PMID: 25613368
9. Marmot M, Friel S, Bell R, Houweling TAJ, Closing the gap in a generation: health equity through action on the social determinants of health. *Lancet*. 2008; 372:1661–1669. [https://doi.org/10.1016/S0140-6736\(08\)61690-6](https://doi.org/10.1016/S0140-6736(08)61690-6) PMID: 18994664
10. World Health Organisation. Breastfeeding [Internet]. Available from: [https://www.who.int/health-topics/breastfeeding#tab=tab\\_1](https://www.who.int/health-topics/breastfeeding#tab=tab_1) [cited 2023 Jan 23].
11. Morrison AH, Gentry R, Anderson J. Mothers' Reasons for Early Breastfeeding Cessation. *MCN Am J Matern Child Nurs*. 2019 Nov 1; 44(6):325–330. <https://doi.org/10.1097/NMC.0000000000000566> PMID: 31633522
12. Ajetunmobi OM, Whyte B, Chalmers J, Tappin DM, Wolfson L, Fleming M, et al. Breastfeeding is associated with reduced childhood hospitalization: Evidence from a scottish birth cohort (1997–2009). *J Pediatr*. 2015; 166(3):620–625. <https://doi.org/10.1016/j.jpeds.2014.11.013> PMID: 25556021
13. Victora CG, Bahl R, Barros AJD, França GVA, Horton S, Krasevec J, et al. Breastfeeding in the 21st century: Epidemiology, mechanisms, and lifelong effect. *Lancet*. 2016; 387(10017):475–490. [https://doi.org/10.1016/S0140-6736\(15\)01024-7](https://doi.org/10.1016/S0140-6736(15)01024-7) PMID: 26869575
14. Ghozy S, Tran L, Naveed S, Quynh TTH, Helmy Zayan A, Waqas A, et al. Association of breastfeeding status with risk of autism spectrum disorder: A systematic review, dose-response analysis and meta-analysis. *Asian J Psychiatr*. 2020; 48:101916. <https://doi.org/10.1016/j.ajp.2019.101916> PMID: 31923810
15. Tseng PT, Chen YW, Stubbs B, Carvalho AF, Whiteley P, Tang CH, et al. Maternal breastfeeding and autism spectrum disorder in children: A systematic review and meta-analysis. *Nutr Neurosci*. 2019; 22(5):354–362. <https://doi.org/10.1080/1028415X.2017.1388598> PMID: 29046132

16. Zeng Y, Tang Y, Tang J, Shi J, Zhang L, Zhu T, et al. Association between the different duration of breastfeeding and attention deficit/hyperactivity disorder in children: a systematic review and meta-analysis. *Nutr Neurosci*. 2020; 23(10):811–823. <https://doi.org/10.1080/1028415X.2018.1560905> PMID: 30577717
17. Tseng P-T, Yen C-F, Chen Y-W, Stubbs B, Carvalho AF, Whiteley P, et al. Maternal breastfeeding and attention-deficit/hyperactivity disorder in children: a meta-analysis. *Eur Child Adolesc Psychiatry*. 2018; 28(1):19–30. <https://doi.org/10.1007/s00787-018-1182-4> PMID: 29907910
18. Tomblin JB, Smith E, Zhang X, Smith E, Tomblin JB, Smith E, et al. Epidemiology of specific language impairment: Prenatal and perinatal risk factors. *J Commun Disord*. 1997; 30(4):325–344. [https://doi.org/10.1016/s0021-9924\(97\)00015-4](https://doi.org/10.1016/s0021-9924(97)00015-4) PMID: 9208366
19. Diepeveen FB, van Dommelen P, Oudesluys-Murphy AM, Verkerk PH. Specific language impairment is associated with maternal and family factors. *Child Care Health Dev*. 2017; 43(3):401–405. <https://doi.org/10.1111/cch.12451> PMID: 28321888
20. Oddy WH. Long-term health outcomes and mechanisms associated with breastfeeding. *Expert Rev Pharmacoecon Outcomes Res*. 2002; 2(2):161–177. <https://doi.org/10.1586/14737167.2.2.161> PMID: 19807327
21. de Mola CL, Horta BL, Gonçalves H, Quevedo LDA, Pinheiro R, Gigante DP, et al. Breastfeeding and mental health in adulthood: A birth cohort study in Brazil. *J Affect Disord*. 2016; 15(202):115–119.
22. Belfort MB, Rifas-Shiman SL, Kleinman KP, Bellinger DC, Harris MH, Taveras EM, et al. Infant breastfeeding duration and mid-childhood executive function, behavior, and social-emotional development. *J Dev Behav Pediatr*. 2016; 37(1):43. <https://doi.org/10.1097/DBP.000000000000237> PMID: 26651091
23. Poton WL, Soares ALG, Oliveira ERA d, Gonçalves H. Breastfeeding and behavior disorders among children and adolescents: a systematic review. *Rev Saude Publica*. 2018;52.
24. Horta BL, Loret De Mola C, Victora CG. Breastfeeding and intelligence: A systematic review and meta-analysis. *Acta Paediatr*. 2015; 104(467):14–19. <https://doi.org/10.1111/apa.13139> PMID: 26211556
25. Anderson JW, Johnstone BM, Remley DT. Breast-feeding and cognitive development: A meta-analysis. *Am J Clin Nutr*. 1999; 70(4):525–535. <https://doi.org/10.1093/ajcn/70.4.525> PMID: 10500022
26. Scottish Government. Additional support for learning: implementation in 2017–2018 [Internet]. 2019. Available from: <https://www.gov.scot/publications/implementation-additional-support-learning-2017-2018/pages/4/> [cited 2023 Jan 23].
27. Lehner A, Staub K, Aldakak L, Eppenberger P, Rühli F, Martin RD, et al. Impact of omega-3 fatty acid DHA and EPA supplementation in pregnant or breast-feeding women on cognitive performance of children: systematic review and meta-analysis. *Nutr Rev*. 2021; 79(5):585–598. <https://doi.org/10.1093/nutrit/nuaa060> PMID: 32918470
28. Shafai T, Mustafa M, Hild T, Mulari J, Curtis A. The Association of Early Weaning and Formula Feeding with Autism Spectrum Disorders. *Breastfeed Med*. 2014; 9(5):275–276. <https://doi.org/10.1089/bfm.2013.0104> PMID: 24506526
29. Winkler B, Aulenbach J, Meyer T, Wiegering A, Eyrieh M, Schlegel P, et al. Formula-feeding is associated with shift towards Th1 cytokines. *Eur J Nutr*. 2015; 54(1):129–138. <https://doi.org/10.1007/s00394-014-0693-0> PMID: 24691724
30. Horta BL, de Sousa BA, de Mola CL. Breastfeeding and neurodevelopmental outcomes. *Curr Opin Clin Nutr Metab Care*. 2018; 21(3):174–178. <https://doi.org/10.1097/MCO.0000000000000453> PMID: 29389723
31. Liu J, Leung P, Yang A. Breastfeeding and Active Bonding Protects against Children's Internalizing Behavior Problems. *Nutrients*. 2014; 6(1):76–89.
32. Beaino G, Khoshnood B, Kaminski M, Marret S, Pierrat V, Vieux R, et al. Predictors of the risk of cognitive deficiency in very preterm infants: The EIPAGE prospective cohort. *Acta Paediatr, Int J Paediatr*. 2011; 100(3):370–378. <https://doi.org/10.1111/j.1651-2227.2010.02064.x> PMID: 21241364
33. Dupont-Soares M, dos Santos M, Garcia EM, Soares MCF, Muccillo-Baisch AL, da Silva Júnior FMR. Maternal, neonatal and socio-economic factors associated with intellectual development among children from a coal mining region in Brazil. *Environ Geochem Health*. 2021; 43(8):3055–3066. <https://doi.org/10.1007/s10653-021-00817-1> PMID: 33496915
34. Plunkett BA, Mele L, Casey BM, Varner MW, Sorokin Y, Reddy UM, et al. Association of Breastfeeding and Child IQ Score at Age 5 Years. *Obstet Gynecol*. 2021; 137(4):561–570. <https://doi.org/10.1097/AOG.0000000000004314> PMID: 33706345
35. Sussmann JE, McIntosh AM, Lawrie SM, Johnstone EC, Sussmann JE, McIntosh AM, et al. Obstetric complications and mild to moderate intellectual disability. *Br J Psychiatry*. 2009; 194(3):224–228. <https://doi.org/10.1192/bjp.bp.106.033134> PMID: 19252150



36. Erkkila AT, Isotalo E, Pulkkinen J, Haapanen M-L. Association between school performance, breast milk intake and fatty acid profile of serum lipids in ten-year-old cleft children. *J Craniofac Surg.* 2005; 16(5):764–769. <https://doi.org/10.1097/01.scs.0000168758.02040.98> PMID: 16192854
37. Menkes JH. Early feeding history of children with learning disorders. *Dev Med Child Neurol.* 1977; 19(2):169–171. <https://doi.org/10.1111/j.1469-8749.1977.tb07966.x> PMID: 858447
38. Camargo-Figuera FA, Barros AJD1, Santos IS, Matijasevich A, Barros FC. Early life determinants of low IQ at age 6 in children from the 2004 Pelotas Birth Cohort: A predictive approach. *BMC Pediatr.* 2014; 14(1):1–12. <https://doi.org/10.1186/s12887-014-0308-1> PMID: 25510879
39. Omar N, Kokab F. Intellectual disability among special children and its associated factors: A case control study, Lahore Pakistan. *J Pak Med Assoc.* 2019; 69(5):684–689. PMID: 31105288
40. Public Health Scotland. CHI Number. Available from: <https://www.ndc.scot.nhs.uk/Dictionary-A-Z/Definitions/index.asp?ID=128&Title=CHI%20Number> [cited 2023 Jan 23].
41. Wood R, Clark D, King A, Mackay D, Pell JP. Novel cross-sectoral linkage of routine health and education data at an all-Scotland level: a feasibility study. *Lancet.* 2013; 382:S10.
42. Fleming M. Using Scotland-wide record linkage to investigate the educational and health outcomes of children treated for chronic conditions. PhD thesis. 2017. Available from: <http://theses.gla.ac.uk/8594/1/2017flemingphd.pdf> [cited 2022 Oct 18].
43. Public Health Scotland. Child health systems programme—pre-school. Available from: <https://beta.isdscotland.org/topics/child-health/child-health-programme/child-health-systems-programme-pre-school/> [cited 2022 Oct 18].
44. Scottish Government. Scottish Exchange of Data: school-pupil census. 2021. Available from: <https://www.gov.scot/publications/scottish-exchange-of-data-school-pupil-census/> [cited 2022 Oct 18].
45. Twisk JW. Applied longitudinal data analysis for epidemiology: a practical guide. Cambridge University Press. 2013.
46. Cui J. QIC program and model selection in GEE analyses. *Stata J.* 2007; 7(2):209–220.
47. Rendón-Macías ME, Castañeda-Muciño G, Cruz JJ, Mejía-Arangur JM, Villasís-Keever MA. Breast-feeding Among Patients with Congenital Malformations. *Arch Med Res.* 2002; 33(3):269–275. [https://doi.org/10.1016/s0188-4409\(02\)00361-2](https://doi.org/10.1016/s0188-4409(02)00361-2) PMID: 12031633
48. Gottschlich MM, Mayes T, Allgeier C, James L, Khoury J, Pan B, et al. A Retrospective Study Identifying Breast Milk Feeding Disparities in Infants with Cleft Palate. *J Acad Nutr Diet.* 2018; 118(11):2154–2161. <https://doi.org/10.1016/j.jand.2018.05.008> PMID: 30007797
49. Magenis ML, de Faveri W, Castro K, Forte GC, Grande AJ, Perry IS. Down syndrome and breastfeeding: A systematic review. *J Intellect Disabil.* 2022; 26(1):244–263. <https://doi.org/10.1177/1744629520970078> PMID: 33234015
50. Santoro JD, Pagarkar D, Chu DT, Rosso M, Paulsen KC, Levitt P, et al. Neurologic complications of Down syndrome: a systematic review. *J Neurol.* 2021; 268(12):4495–4509. <https://doi.org/10.1007/s00415-020-10179-w> PMID: 32920658
51. Renfrew MJ, Dyson L, McCormick F, Misso K, Stenhouse E, King SE, et al. Breastfeeding promotion for infants in neonatal units: A systematic review. *Child Care Health Dev.* 2010; 36(2):165–178. <https://doi.org/10.1111/j.1365-2214.2009.01018.x> PMID: 19886907
52. McInnes RJ, Chambers J. Infants admitted to neonatal units—interventions to improve breastfeeding outcomes: a systematic review 1990–2007. *Matern Child Nutr.* 2008; 4(4):235–263. <https://doi.org/10.1111/j.1740-8709.2008.00150.x> PMID: 18811790
53. Renfrew M, Craig D, Dyson L, McCormick F, Rice S, King S, et al. Breastfeeding promotion for infants in neonatal units: a systematic review and economic analysis. *Health Technol Assess.* 2009; 13(40):1–350. <https://doi.org/10.3310/hta13400> PMID: 19728934
54. Scottish Council of Independent Schools. Facts & Figures: Annual Census. 2020. Available from: <https://www.scis.org.uk/facts-and-figures/> [cited 2023 Jan 23].
55. Public Health Scotland. Births in Scottish hospitals—Year ending 31 March 2020. 2020. Available from: <https://publichealthscotland.scot/publications/births-in-scottish-hospitals/births-in-scottish-hospitals-year-ending-31-march-2020/> [cited 2023 Jan 23].
56. Public Health Scotland. Infant feeding statistics Scotland. Financial year 2020/21. Available from: <https://publichealthscotland.scot/media/9971/2021-11-02-infant-feeding-statistics-report.pdf> [cited 2023 Jan 23].
57. Public Health Scotland. Child Health Programme. 2020. Available from: <https://www.isdscotland.org/Health-topics/Child-health/Child-Health-Programme/Child-Health-Systems-Programme-Pre-School.asp#Reviews> [cited 2023 Jan 23].

58. Neves PAR, Vaz JS, Maia FS, Baker P, Gatica-Dominguez G, Piwoz E, et al. Rates and time trends in the consumptions of breastmilk, formula, and animal milk by children younger than 2 years from 2000 to 2019: analysis of 113 countries. *Lancet Child Adolesc Health*. 2021; 5(9):619–630.
59. Jedrychowski W, Maugeri U, Perera F, Stigter L, Jankowski J, Butscher M, et al. Cognitive function of 6-year old children exposed to mold-contaminated homes in early postnatal period. Prospective birth cohort study in Poland. *Physiol Behav*. 2011; 104(5):989–995. <https://doi.org/10.1016/j.physbeh.2011.06.019> PMID: 21763705
60. Md Golam H, Md Saimul I, Kazi Enamul H, Md Ashraful I, Mamun A, Kamruzzaman M, et al. Prevalence of Underweight and Effect of Nutritional Status on Academic Performance of Primary School Children in Chapainawabganj District, Bangladesh. *Malays J Nutr*. 2014 Jan; 20(1):71–81. Available from: <http://search.ebscohost.com/login.aspx?direct=true&db=cin20&AN=96315905&site=ehost-live> [cited 2023 Jan 23].
61. Ronfani L, Brumatti LV, Mariuz M, Tognin V, Bin M, Ferluga V, et al. The Complex interaction between home environment, socioeconomic status, maternal IQ and early child neurocognitive development: a multivariate analysis of data collected in a newborn cohort study. *PLoS ONE*. 2015 May 21; 10(5):e0127052. <https://doi.org/10.1371/journal.pone.0127052> PMID: 25996934
62. Yanuarti HP, Rusmil K, Effendi SH. Environment as a risk factor in delayed development in premature, low-birthweight and mild asphyxia children. *Pediatr Int*. 2014; 56(5):720–725. <https://doi.org/10.1111/ped.12333> PMID: 24617923
63. Kristiansen AL, Lande B, Øverby NC, Andersen LF. Factors associated with exclusive breast-feeding and breast-feeding in Norway. *Public Health Nutr* 2010 Dec; 13(12):2087–96. <https://doi.org/10.1017/S1368980010002156> PMID: 20707948
64. Cohen SS, Alexander DD, Krebs NF, Young BE, Cabana MD, Erdmann P, et al. Factors associated with breastfeeding initiation and continuation: a meta-analysis. *J Pediatr*. 2018 Dec 1; 203:190–196. <https://doi.org/10.1016/j.jpeds.2018.08.008> PMID: 30293638
65. Simpson DA, Quigley MA, Kurinczuk JJ, Carson C. Twenty-five-year trends in breastfeeding initiation: the effects of sociodemographic changes in Great Britain, 1985–2010. *PLoS ONE*. 2019 Jan 1; 14(1):e0210838. <https://doi.org/10.1371/journal.pone.0210838> PMID: 30653579
66. Sabri N, Gan WY, Law LS, Chin YS, Mohd Shariff Z. Factors associated with cognitive and motor delays in Malaysian infants aged 6–12 months. *Early Child Dev Care*. 2020 [cited 2021 Sep 2]; Available from: <https://www.tandfonline.com/doi/full/10.1080/03004430.2020.1801666>
67. Johnson S, Evans TA, Draper ES, Field DJ, Manktelow BN, Marlow N, et al. Neurodevelopmental outcomes following late and moderate prematurity: a population-based cohort study. *Arch Dis Child Fetal Neonatal Ed*. 2015; 100(4):F301–F308. <https://doi.org/10.1136/archdischild-2014-307684> PMID: 25834170
68. Binns C, Lee M, Low WY. The Long-Term Public Health Benefits of Breastfeeding. *Asia Pac J Public Health*. 2016 Jan 20; 28(1):7–14. <https://doi.org/10.1177/1010539515624964> PMID: 26792873
69. Barclay AR, Russell RK, Wilson ML, Gilmour WH, Satsangi J, Wilson DC. Systematic review: the role of breastfeeding in the development of pediatric inflammatory bowel disease. *J Pediatr*. 2009 Sep 1; 155(3):421–426. <https://doi.org/10.1016/j.jpeds.2009.03.017> PMID: 19464699
70. Oddy WH. Breastfeeding, Childhood Asthma, and Allergic Disease. *Ann Nutr Metab*. 2017 May 1; 70(Suppl. 2):26–36. <https://doi.org/10.1159/000457920> PMID: 28521318
71. Fleming M, Fitton CA, Steiner MFC, McLay JS, Clark D, King A, et al. Educational and health outcomes of children treated for asthma: Scotland-wide record linkage study of 683,716 children. *Eur Respir J*. 2019 Sep 1; 54(3).
72. Fleming M, Fitton CA, Steiner MFC, McLay JS, Clark D, King A, et al. Educational and health outcomes of children treated for type 1 diabetes: Scotland-wide record linkage study of 766,047 children. *Diabetes Care*. 2019 Sep 1; 42(9):1700–1707. <https://doi.org/10.2337/dc18-2423> PMID: 31308017
73. Fleming M, Fitton CA, Steiner MFC, McLay JS, Clark D, King A, et al. Educational and health outcomes of children and adolescents receiving antidepressant medication: Scotland-wide retrospective record linkage cohort study of 766 237 schoolchildren. *Int J Epidemiol*. 2020 Aug 1; 49(4):1380–1391.
74. Fleming M, McLay JS, Clark D, King A, Mackay DF, Pell JP. Health, educational and employment outcomes among children treated for a skin disorder: Scotland-wide retrospective record linkage cohort study of 766,244 children. *PLoS ONE*. 2020 Dec 1; 15. <https://doi.org/10.1371/journal.pone.0243383> PMID: 33306713
75. Haroon S, Das JK, Salam RA, Imdad A, Bhutta ZA. Breastfeeding promotion interventions and breast-feeding practices: a systematic review. *BMC Public Health*. 2013 Sep 17; 13(3):1–18. <https://doi.org/10.1186/1471-2458-13-S3-S20> PMID: 24564836

76. Fairbank L, O'Meara S, Renfrew MJ, Woolridge M, Sowden AJ, Lister-Sharp D. Systematic review to evaluate the effectiveness of interventions to promote the initiation of breastfeeding. *Health Technol Assess*. 2000 Dec 7;4(25).
77. Scottish Government. *Becoming Breastfeeding Friendly Scotland* [Internet]. 2019 Available from: <https://www.gov.scot/publications/becoming-breastfeeding-friendly-scotland-report/pages/4/> [cited 2023 Jan 23].
